# Supplementary material for: New Small Molecule Drugs for Thrombocytopenia: Chemical, Pharmacological, and Therapeutic Use Considerations
Source: Int J Mol Sci. 2019 Jun 20;20(12):3013. doi: 10.3390/ijms20123013 (PMC6628068; doi:10.3390/ijms20123013)
Supplement: Supplementary file 1 [file ijms-20-03013-s001.pdf]

**New Small Molecule Drugs for Thrombocytopenia:  
Chemical, Pharmacological, and Therapeutic Use Considerations**

Page Clemons Bankston<sup>1</sup> and Rami A. Al-Horani<sup>1\*</sup>

*<sup>1</sup>Division of Basic Pharmaceutical Sciences, College of Pharmacy, Xavier University of Louisiana,  
New Orleans, Louisiana 70125*

\* Address for correspondence: Dr. Rami A. Al-Horani, 1 Drexel Drive, Suite 327, New Orleans, LA 70125-1089. Phone: (504) 520-7603, Fax: (504) 520-7954, Email: [ralhoran@xula.edu](mailto:ralhoran@xula.edu)

**Table S1.** FDA-approved TPO-R agonists and SYK inhibitor for immune thrombocytopenia.

| Treatments             | Romiplostim<br>(Nplate®) (August 2008)                                                                                                                                                                                                                                                                                                                                                  | Eltrombopag<br>(Promacta®) (November 2008)                                                                                                                                                                                                                                                                                                                                                                                                                                                                                                                         | Lusutrombopag<br>(Mulpleta®) (July 2018)                                                                               | Avatrombopag<br>(Doptelet®) (May 2018)                                                                                 | Fostamatinib<br>(Tavalisse®) (April 2018)                                                                                                      |
|------------------------|-----------------------------------------------------------------------------------------------------------------------------------------------------------------------------------------------------------------------------------------------------------------------------------------------------------------------------------------------------------------------------------------|--------------------------------------------------------------------------------------------------------------------------------------------------------------------------------------------------------------------------------------------------------------------------------------------------------------------------------------------------------------------------------------------------------------------------------------------------------------------------------------------------------------------------------------------------------------------|------------------------------------------------------------------------------------------------------------------------|------------------------------------------------------------------------------------------------------------------------|------------------------------------------------------------------------------------------------------------------------------------------------|
| Nature                 | Fusion protein analog of TPO                                                                                                                                                                                                                                                                                                                                                            | Small molecule                                                                                                                                                                                                                                                                                                                                                                                                                                                                                                                                                     | Small molecule                                                                                                         | Small molecule                                                                                                         | Small molecule; prodrug                                                                                                                        |
| Target                 | TPO-R                                                                                                                                                                                                                                                                                                                                                                                   | TPO-R                                                                                                                                                                                                                                                                                                                                                                                                                                                                                                                                                              | TPO-R                                                                                                                  | TPO-R                                                                                                                  | SYK                                                                                                                                            |
| Administration         | Subcutaneous; 1 mcg/kg once weekly                                                                                                                                                                                                                                                                                                                                                      | Oral; 50 mg once daily                                                                                                                                                                                                                                                                                                                                                                                                                                                                                                                                             | Oral; 3 mg once daily for 7 days                                                                                       | Oral; 40 or 60 mg once daily for 5 days depending on platelet count                                                    | Oral: Initial: 100 mg twice daily (may increase to 150 mg) for 12 weeks                                                                        |
| Approved indication(s) | 1) Treatment of thrombocytopenia in adult patients with chronic immune thrombocytopenia (ITP) who have had insufficient response to corticosteroids, immune globulin, or splenectomy<br>2) Treatment of thrombocytopenia in pediatric patients $\geq 1$ year of age with ITP for $\geq 6$ months who have had insufficient response to corticosteroids, immune globulin, or splenectomy | 1) First-line treatment of severe aplastic anemia in patients $\geq 2$ years<br>2) Treatment of severe aplastic anemia in patients who have had an insufficient response to immune-suppressive therapy<br>3) Treatment of thrombocytopenia in patients with chronic hepatitis C to allow the initiation and maintenance of interferon therapy<br>4) Treatment of thrombocytopenia in adult and pediatric patients $\geq 1$ year of age with chronic immune thrombocytopenia who have had insufficient response to corticosteroids, immunoglobulins, or splenectomy | 1) Treatment of thrombocytopenia in adult patients with chronic liver disease who are scheduled to undergo a procedure | 1) Treatment of thrombocytopenia in adult patients with chronic liver disease who are scheduled to undergo a procedure | 1) Treatment of thrombocytopenia in adults with chronic immune thrombo-cytopenia who have had an insufficient response to a previous treatment |
| Onset of action        | 4-9 days                                                                                                                                                                                                                                                                                                                                                                                | 7-14 days                                                                                                                                                                                                                                                                                                                                                                                                                                                                                                                                                          | Median 12 days                                                                                                         | 3-5 days                                                                                                               | Median 15 days                                                                                                                                 |
| Elimination half-life  | Median 3.5 days (Platelet count returns to baseline in 28 days)                                                                                                                                                                                                                                                                                                                         | 21-32 hours (Platelet count returns to baseline in 7-14 days)                                                                                                                                                                                                                                                                                                                                                                                                                                                                                                      | 27 hours                                                                                                               | 19 hours (Platelet count returns to baseline in 35 days)                                                               | 15 ( $\pm 4.3$ ) hours                                                                                                                         |
| Drug interactions      | None is known                                                                                                                                                                                                                                                                                                                                                                           | It is substrate of CYP3A4 and inhibitor of BCRP and P-glycoprotein                                                                                                                                                                                                                                                                                                                                                                                                                                                                                                 | None is known                                                                                                          | It is substrate of CYP2C9 (minor), CYP3A4 (minor), P-glycoprotein                                                      | It is substrate of CYP3A4 and UGT1A9 and inhibitor of BCRP and P-glycoprotein                                                                  |
| Frequent side effects  | Arthralgia, dizziness, insomnia, myalgia, pain in extremity, abdominal pain, shoulder pain, dyspepsia, and paresthesia                                                                                                                                                                                                                                                                  | Nausea, vomiting, menorrhagia, myalgia, paresthesia, cataract                                                                                                                                                                                                                                                                                                                                                                                                                                                                                                      | Headache                                                                                                               | Pyrexia, abdominal pain, nausea, headache, fatigue, and edema peripheral                                               | Diarrhea, hypertension, nausea, respiratory infection, dizziness, ALT/AST increased, rash, abdominal pain, fatigue, chest pain and neutropenia |
| Others                 | No adjustment in renal or liver impairment; Pregnancy risk C                                                                                                                                                                                                                                                                                                                            | Not studied in renal impairment; Half the dose is used in liver impairment; Pregnancy risk C                                                                                                                                                                                                                                                                                                                                                                                                                                                                       | No adjustment in renal or liver impairment                                                                             | No adjustment in renal or liver impairment                                                                             | No adjustment in renal or liver impairment                                                                                                     |
